# Supplementary material
Source: Springer Nature journal article supplement (https://www.springermedizin.de/resource/supplementary/12943_2010_604_MOESM7_ESM.pdf/9555090)
Supplement: MOESM7 [file 9555090]

AR    AR+Myc-Gli2ΔN  
Myc-Gli2ΔN    AR    AR+Myc-Gli2ΔN  
Myc-Gli2ΔN

AR IP

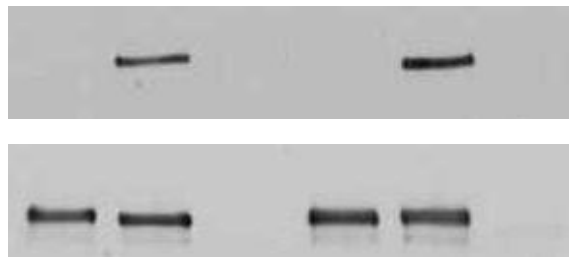

WB: α-Myc  
WB: α-AR

Myc IP

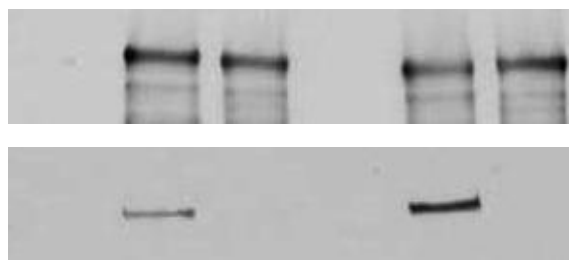

WB: α-Myc  
WB: α-AR

Lysate

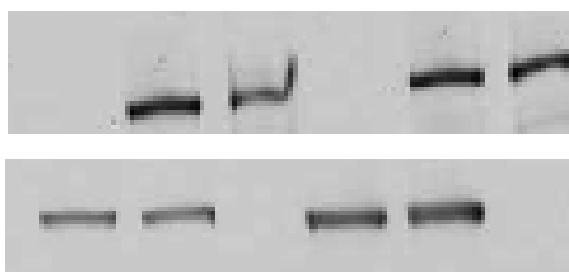

WB: α-Myc  
WB: α-AR

CS-FBS    +R1881
